# Supplementary material for: Lithium coordination in protic ionic liquids
Source: Royal Society of Chemistry journal article supplement (doi:10.1039/c3cp55183k), 2014-01-01
Supplement: c3cp55183k.pdf [file c3cp55183k.pdf]

## Supplementary Information

### Lithium coordination in protic ionic liquids

*S. Menne, T. Vogl and A. Balducci* \*<sup>a</sup>

E-mail: andrea.balducci@uni-muenster.de

#### SI1

Table 1.

Conductivity and viscosity at 30°C of binary mixtures containing PYR<sub>14</sub>TFSI, PYR<sub>H4</sub>TFSI and PYR<sub>HH</sub>TFSI and the lithium salt LiTFSI.

|                        | Conductivity / mS cm <sup>-1</sup> |             |             |             | Viscosity / mPa s  |             |             |             |
|------------------------|------------------------------------|-------------|-------------|-------------|--------------------|-------------|-------------|-------------|
|                        | <i>molar ratio</i>                 |             |             |             | <i>molar ratio</i> |             |             |             |
|                        | <i>0.06</i>                        | <i>0.08</i> | <i>0.09</i> | <i>0.11</i> | <i>0.06</i>        | <i>0.08</i> | <i>0.09</i> | <i>0.11</i> |
| PYR <sub>HH</sub> TFSI | 3.0                                | -           | -           | 2.2         | 86.9               | -           | -           | 123.1       |
| PYR <sub>H4</sub> TFSI | -                                  | 2.9         | -           | -           | -                  | 69.5        | -           | -           |
| PYR <sub>14</sub> TFSI | -                                  | -           | 2.5         | -           | -                  | -           | 87.6        | -           |

These mixtures have been considered in Fig. 3

## SI2

Table2

Comparison of the peak wavenumber assigned to the “free” TFSI<sup>-</sup> of various aprotic ionic liquids.

| Ionic liquid                          | Peak wavenumber / cm <sup>-1</sup> | Reference |
|---------------------------------------|------------------------------------|-----------|
| BMITFSI                               | 742                                | [26]      |
| EMITFSI                               | 742±1                              | [7]       |
|                                       | 742                                | [27]      |
| PYR <sub>13</sub> TFSI                | 742                                | [28]      |
| PYR <sub>x</sub> TFSI (x=3,4,5,6,7,8) | 742.3±0.2                          | [23]      |
| PYR <sub>1[20x]</sub> TFSI (x=1,2)    | 742.2                              | [16]      |

### References (from the text)

7. L.J. Hardwick, M. Holzapfel, A. Wokaun, P. Novák, *J. Raman Spectrosc.*, 2007, **38**, 110-112.
16. M. Kunze, E. Paillard, S. Jeong, G.B. Appetecchi, M. Schönhoff, M. Winter, S. Passerini, *The Journal of Physical Chemistry C*, 2011, **115**, 19431-19436.
24. M. Kunze, S. Kunze, E. Jeong, M. Paillard, M. Schönhoff, S. Winter, M. Passerini, Kunze, *Advanced energy materials*, 2011, **1**, 274-281.
26. S. Duluard, J. Grondin, J.-L. Bruneel, I. Pianet, A. Grélard, G. Campet, M.-H. Delville, J.-C. Lassègues, *J. Raman Spectrosc.*, 2008, **39**, 627-632.
27. J.-C. Lassègues, J. Grondin, D. Talaga, *Phys. Chem. Chem. Phys.*, 2006, **8**, 5629-5632.
28. M. Castriota, T. Caruso, R.G. Agostino, E. Cazzanelli, W.A. Henderson, S. Passerini, *The Journal of Physical Chemistry A*, 2004, **109**, 92-96.
